# Supplementary material for: Primary care use and cardiovascular disease risk in Russian 40–69 year olds: a cross-sectional study
Source: PubMed Central journal article supplement (PMC7577087; doi:10.1136/jech-2019-213549), 2020-09-01
Supplement: jech-2019-213549s001.pdf [file jech-2019-213549s001.pdf]

## Supplementary materials - Tables

**Table S1** Characteristics of 40-69 year olds with and without recent primary care contact (primary care visit past year or recent general health check attendance).

| Theme           | Co-variate               | Contact |       | No contact |       |
|-----------------|--------------------------|---------|-------|------------|-------|
|                 |                          | N       | %     | N          | %     |
| Demographics    | Total                    | 2,134   | 100   | 640        | 100   |
|                 | Male                     | 802     | 37.6  | 380        | 59.4  |
|                 | Female                   | 1,332   | 62.4  | 260        | 40.6  |
|                 | 40-44yr                  | 354     | 16.6  | 131        | 20.5  |
|                 | 45-49yr                  | 382     | 17.9  | 107        | 16.7  |
|                 | 50-54yr                  | 371     | 17.4  | 122        | 19.1  |
|                 | 55-59yr                  | 359     | 16.8  | 111        | 17.3  |
|                 | 60-64yr                  | 350     | 16.4  | 99         | 15.5  |
|                 | 65-69yr                  | 318     | 14.9  | 70         | 10.9  |
|                 | Mean age (SD)            | 54.6    | (8.5) | 53.6       | (8.4) |
| Health check    | Dispansarisation         |         |       |            |       |
|                 | No                       | 873     | 40.9  | 640        | 100   |
|                 | Yes                      | 1,261   | 59.1  | 0          | 0     |
| Socio-economics | Education                |         |       |            |       |
|                 | Elementary only          | 246     | 11.5  | 106        | 16.6  |
|                 | Intermediary             | 1,031   | 48.3  | 306        | 47.8  |
|                 | Graduate                 | 857     | 40.2  | 228        | 35.6  |
|                 | Economic activity        |         |       |            |       |
|                 | Paid work                | 767     | 36.0  | 277        | 43.3  |
|                 | Looking after home       | 151     | 7.1   | 33         | 5.2   |
|                 | Unemployed               | 58      | 2.7   | 16         | 2.5   |
|                 | Retired                  | 1,116   | 52.3  | 294        | 45.9  |
|                 | Other                    | 41      | 1.9   | 20         | 3.1   |
|                 | Financial constraints    |         |       |            |       |
|                 | Constrained              | 362     | 17.2  | 118        | 19.2  |
|                 | Intermediary             | 1,037   | 49.2  | 286        | 46.4  |
|                 | Relatively unconstrained | 707     | 33.6  | 212        | 34.4  |
|                 | Social support           | Single  |       |            |       |
| No              |                          | 1,465   | 68.7  | 481        | 75.2  |
| Yes             |                          | 669     | 31.4  | 159        | 24.8  |
| Smoking         | Smoking status           |         |       |            |       |
|                 | Never smoker             | 1,122   | 52.7  | 251        | 39.2  |
|                 | Ex-smoker                | 526     | 24.7  | 154        | 24.1  |
|                 | Current smoker           | 480     | 22.6  | 235        | 36.7  |
| Alcohol         | Alcohol use disorder     |         |       |            |       |
|                 | Non-drinker (past year)  | 252     | 11.9  | 67         | 10.5  |
|                 | Low (Audit score <8)     | 1,640   | 77.1  | 457        | 71.7  |
|                 | High (Audit score 8+)    | 234     | 11.0  | 113        | 17.7  |
|                 | Alcohol intake           |         |       |            |       |
|                 | Non-drinker              | 252     | 11.8  | 67         | 10.5  |
|                 | <2.5g/day                | 920     | 43.2  | 216        | 33.8  |
|                 | 2.5-6.9g/day             | 482     | 22.6  | 162        | 25.4  |
|                 | 7-14.9g/day              | 210     | 9.6   | 87         | 13.6  |

|                                           |                           |       |      |      |      |
|-------------------------------------------|---------------------------|-------|------|------|------|
|                                           | 15-20.9g/day              | 93    | 4.4  | 31   | 4.9  |
|                                           | 21+g/day                  | 174   | 8.2  | 76   | 11.9 |
| Exercise                                  | Physical activity         |       |      |      |      |
|                                           | Inactive                  | 143   | 6.8  | 39   | 6.2  |
|                                           | Moderately inactive       | 212   | 10.1 | 67   | 10.7 |
|                                           | Moderately active         | 1,168 | 55.4 | 335  | 53.3 |
|                                           | Active                    | 587   | 27.8 | 187  | 29.8 |
| Health                                    | BMI class                 |       |      |      |      |
|                                           | Normal/under weight       | 674   | 31.6 | 213  | 33.4 |
|                                           | Overweight                | 811   | 38.0 | 229  | 35.9 |
|                                           | Obese                     | 648   | 30.4 | 196  | 30.7 |
|                                           | Self-rated general health |       |      |      |      |
|                                           | Poor/fair/good            | 1,178 | 55.3 | 254  | 39.7 |
|                                           | Very good/excellent       | 951   | 44.7 | 386  | 60.3 |
|                                           | Chest pain                |       |      |      |      |
|                                           | No chest pain             | 1,244 | 59.7 | 442  | 71.1 |
|                                           | Non-anginal chest pain    | 572   | 27.5 | 127  | 20.4 |
|                                           | Grade 1 angina            | 218   | 10.5 | 49   | 7.9  |
|                                           | Grade 2 angina            | 49    | 2.4  | 4    | 0.6  |
|                                           | CVD risk 10yr SCORE       |       |      |      |      |
|                                           | <1%                       | 743   | 35.4 | 193  | 30.8 |
|                                           | 1-4.9%                    | 899   | 42.8 | 227  | 36.3 |
|                                           | 5+%                       | 458   | 21.8 | 206  | 32.9 |
|                                           | Hypertension class        |       |      |      |      |
|                                           | Normotensive              | 931   | 44.1 | 298  | 47.3 |
|                                           | Controlled hypertension   | 404   | 19.1 | 43   | 6.8  |
|                                           | Uncontrolled hypertension | 372   | 17.6 | 91   | 14.4 |
| Untreated hypertension                    | 404                       | 19.1  | 198  | 31.4 |      |
| Hypertension aware                        |                           |       |      |      |      |
| No                                        | 1,139                     | 53.4  | 429  | 67.0 |      |
| Yes                                       | 995                       | 46.6  | 211  | 33.0 |      |
| Diabetic                                  |                           |       |      |      |      |
| No                                        | 1,940                     | 90.9  | 605  | 94.5 |      |
| Yes                                       | 194                       | 9.1   | 35   | 5.5  |      |
| CKD                                       |                           |       |      |      |      |
| No                                        | 2,062                     | 96.6  | 618  | 96.6 |      |
| Yes                                       | 72                        | 3.4   | 22   | 3.4  |      |
| Any care-intensive condition <sup>a</sup> |                           |       |      |      |      |
| No                                        | 1,106                     | 51.8  | 427  | 66.7 |      |
| Yes                                       | 1,028                     | 48.2  | 213  | 33.3 |      |
| Medication                                | Polypharmacy 5+rx         |       |      |      |      |
|                                           | No                        | 2,015 | 94.4 | 635  | 99.2 |
|                                           | Yes                       | 119   | 5.6  | 5    | 0.8  |
|                                           | Non-opioid analgesics     |       |      |      |      |
|                                           | No                        | 2,105 | 98.6 | 632  | 98.8 |
| Yes                                       | 29                        | 1.4   | 8    | 1.3  |      |

<sup>a</sup>) Care-intensive conditions included: CKD, chronic bronchitis, cancer, asthma, rheumatoid arthritis, osteoarthritis, migraine, opioid analgesics use.

**Table S2** Mean number of primary care visits past year in 40-69 year olds and proportion% of CVD-free with no recent primary care contact standardised to 2013 European Standard Population and Male-Female odds ratios adjusted for age or age, education, and financial constraints.

| Metric                                                                                                                                                | N     | Mean (median) | Proportion % | SE   | 95% CI    | Male - Female OR (age) | 95% CI    | Male-Female OR (age/education/financial constraints) | 95% CI    |
|-------------------------------------------------------------------------------------------------------------------------------------------------------|-------|---------------|--------------|------|-----------|------------------------|-----------|------------------------------------------------------|-----------|
| Mean number of primary care visits past year in 40-69 year olds                                                                                       |       |               |              |      |           |                        |           |                                                      |           |
| Male                                                                                                                                                  | 1,591 | 2.37 (1)      | -            | 0.08 | 2.23-2.52 | -                      | -         | -                                                    | -         |
| Female                                                                                                                                                | 2,191 | 3.36 (2)      | -            | 0.07 | 3.23-3.50 | -                      | -         | -                                                    | -         |
| Total                                                                                                                                                 | 3,782 | 2.95 (2)      | -            | 0.05 | 2.85-3.05 | -                      | -         | -                                                    | -         |
| Proportion of CVD-free 40-69 year olds population with no primary care visit past year nor recent general health check attendance (Dispansarisation)% |       |               |              |      |           |                        |           |                                                      |           |
| Male                                                                                                                                                  | 1,182 | -             | 32.3%        | 1.33 | 29.7-35.0 | -                      | -         | -                                                    | -         |
| Female                                                                                                                                                | 1,592 | -             | 16.3%        | 0.90 | 14.6-18.2 | -                      | -         | -                                                    | -         |
| Total                                                                                                                                                 | 2,774 | -             | 23.1%        | 0.78 | 21.6-24.7 | 2.45                   | 2.05-2.94 | 2.48                                                 | 2.05-2.98 |
| Proportion of CVD-free 40-69 year olds population with no recent general health check attendance (Dispansarisation)%                                  |       |               |              |      |           |                        |           |                                                      |           |
| Male                                                                                                                                                  | 1,182 | -             | 69.1%        | 1.33 | 66.4-71.6 | -                      | -         | -                                                    | -         |
| Female                                                                                                                                                | 1,592 | -             | 44.0%        | 1.24 | 41.6-46.4 | -                      | -         | -                                                    | -         |
| Total                                                                                                                                                 | 2,774 | -             | 54.6%        | 0.94 | 52.8-56.5 | 2.86                   | 2.44-3.36 | 2.90                                                 | 2.46-3.41 |

**Table S3** Characteristics of 40-69 year old males with and without recent primary care contact (primary care visit past year or recent general health check attendance).

| Theme           | Co-variate               | Contact |       | No contact |       |
|-----------------|--------------------------|---------|-------|------------|-------|
|                 |                          | N       | %     | N          | %     |
| Demographics    | Total                    | 802     | 100   | 380        | 100   |
|                 | 40-44yr                  | 117     | 14.6  | 73         | 19.2  |
|                 | 45-49yr                  | 148     | 18.5  | 60         | 15.8  |
|                 | 50-54yr                  | 138     | 17.2  | 73         | 19.2  |
|                 | 55-59yr                  | 134     | 16.7  | 66         | 17.4  |
|                 | 60-64yr                  | 139     | 17.3  | 66         | 17.4  |
|                 | 65-69yr                  | 126     | 15.7  | 42         | 11.1  |
|                 | Mean age (SD)            | 54.9    | (8.5) | 54.0       | (8.4) |
| Health check    | Dispansarisation         |         |       |            |       |
|                 | No                       | 432     | 53.9  | 380        | 100   |
|                 | Yes                      | 370     | 46.1  | 0          | 0.0   |
| Socio-economics | Education                |         |       |            |       |
|                 | Elementary only          | 125     | 15.6  | 71         | 18.7  |
|                 | Intermediary             | 371     | 46.3  | 184        | 48.4  |
|                 | Graduate                 | 306     | 38.2  | 125        | 32.9  |
|                 | Economic activity        |         |       |            |       |
|                 | Paid work                | 323     | 40.3  | 170        | 44.8  |
|                 | Looking after home       | 17      | 2.1   | 10         | 2.6   |
|                 | Unemployed               | 36      | 4.5   | 13         | 3.4   |
|                 | Retired                  | 405     | 50.5  | 171        | 45.0  |
|                 | Other                    | 21      | 2.6   | 16         | 4.2   |
|                 | Financial constraints    |         |       |            |       |
|                 | Constrained              | 109     | 13.9  | 59         | 16.1  |
|                 | Intermediary             | 369     | 47.0  | 172        | 46.9  |
|                 | Relatively unconstrained | 307     | 39.1  | 136        | 37.1  |
| Social support  | Single                   |         |       |            |       |
|                 | No                       | 675     | 84.2  | 322        | 84.7  |
|                 | Yes                      | 127     | 15.8  | 58         | 15.3  |
| Smoking         | Smoking status           |         |       |            |       |
|                 | Never smoker             | 219     | 27.4  | 94         | 24.7  |
|                 | Ex-smoker                | 304     | 38.1  | 116        | 30.5  |
|                 | Current smoker           | 276     | 34.5  | 170        | 44.7  |
| Alcohol         | Alcohol use disorder     |         |       |            |       |
|                 | Non-drinker (past year)  | 116     | 14.5  | 42         | 11.1  |
|                 | Low (Audit score <8)     | 477     | 59.8  | 233        | 61.8  |
|                 | High (Audit score 8+)    | 205     | 25.7  | 102        | 27.1  |

|          |                           |     |      |     |      |
|----------|---------------------------|-----|------|-----|------|
|          | Alcohol intake            |     |      |     |      |
|          | Non-drinker               | 116 | 14.5 | 42  | 11.1 |
|          | <2.5g/day                 | 132 | 16.5 | 67  | 17.7 |
|          | 2.5-6.9g/day              | 190 | 23.7 | 106 | 28.0 |
|          | 7-14.9g/day               | 137 | 17.1 | 69  | 18.2 |
|          | 15-20.9g/day              | 71  | 8.9  | 26  | 6.9  |
|          | 21+g/day                  | 156 | 19.5 | 69  | 18.2 |
| Exercise | Physical activity         |     |      |     |      |
|          | Inactive                  | 41  | 5.2  | 22  | 5.9  |
|          | Moderately inactive       | 87  | 10.9 | 37  | 9.9  |
|          | Moderately active         | 397 | 49.9 | 193 | 51.7 |
|          | Active                    | 271 | 34.1 | 121 | 32.4 |
| Health   | BMI class                 |     |      |     |      |
|          | Normal/under weight       | 238 | 29.7 | 119 | 31.4 |
|          | Overweight                | 371 | 46.3 | 156 | 41.2 |
|          | Obese                     | 193 | 24.1 | 104 | 27.4 |
|          | Self-rated general health |     |      |     |      |
|          | Poor/fair/good            | 386 | 48.3 | 128 | 33.7 |
|          | Very good/excellent       | 414 | 51.8 | 252 | 66.3 |
|          | Chest pain                |     |      |     |      |
|          | No chest pain             | 540 | 68.5 | 283 | 75.7 |
|          | Non-anginal chest pain    | 198 | 25.1 | 73  | 19.5 |
|          | Grade 1 angina            | 43  | 5.5  | 16  | 4.3  |
|          | Grade 2 angina            | 7   | 0.9  | 2   | 0.5  |
|          | CVD risk 10yr SCORE       |     |      |     |      |
|          | <1%                       | 90  | 11.4 | 49  | 13.2 |
|          | 1-4.9%                    | 364 | 46.1 | 150 | 40.4 |
|          | 5+%                       | 336 | 42.5 | 172 | 46.4 |
|          | Hypertension class        |     |      |     |      |
|          | Normotensive              | 303 | 38.3 | 158 | 42.1 |
|          | Controlled hypertension   | 100 | 12.6 | 19  | 5.1  |
|          | Uncontrolled hypertension | 153 | 19.3 | 53  | 14.1 |
|          | Untreated hypertension    | 235 | 29.7 | 145 | 38.7 |
|          | Hypertension aware        |     |      |     |      |
|          | No                        | 431 | 53.7 | 254 | 66.8 |
|          | Yes                       | 371 | 46.3 | 126 | 33.2 |
|          | Diabetic                  |     |      |     |      |
|          | No                        | 742 | 92.5 | 363 | 95.5 |
|          | Yes                       | 60  | 7.5  | 17  | 4.5  |

|            |                                           |     |      |     |      |
|------------|-------------------------------------------|-----|------|-----|------|
|            | CKD                                       |     |      |     |      |
|            | No                                        | 782 | 97.5 | 373 | 98.2 |
|            | Yes                                       | 20  | 2.5  | 7   | 1.8  |
|            | Any care-intensive condition <sup>a</sup> |     |      |     |      |
|            | No                                        | 513 | 64.0 | 272 | 71.6 |
|            | Yes                                       | 289 | 36.0 | 108 | 28.4 |
| Medication | Polypharmacy 5+rx                         |     |      |     |      |
|            | No                                        | 767 | 95.6 | 377 | 99.2 |
|            | Yes                                       | 35  | 4.4  | 3   | 0.8  |
|            | Non-opioid analgesics                     |     |      |     |      |
|            | No                                        | 790 | 98.5 | 376 | 99.0 |
|            | Yes                                       | 12  | 1.5  | 4   | 1.1  |

---

<sup>a</sup>) Care-intensive conditions included: CKD, chronic bronchitis, cancer, asthma, rheumatoid arthritis, osteoarthritis, migraine, opioid analgesics use.

**Table S4** Characteristics of 40-69 year old females with and without recent primary care contact (primary care visit past year or recent general health check attendance).

| Theme                    | Co-variate              | Contact |       | No contact |       |
|--------------------------|-------------------------|---------|-------|------------|-------|
|                          |                         | N       | %     | N          | %     |
| Demographics             | Total                   | 1,332   | 100   | 260        | 100   |
|                          | 40-44yr                 | 237     | 17.8  | 58         | 22.3  |
|                          | 45-49yr                 | 234     | 17.6  | 47         | 18.1  |
|                          | 50-54yr                 | 233     | 17.5  | 49         | 18.9  |
|                          | 55-59yr                 | 225     | 16.9  | 45         | 17.3  |
|                          | 60-64yr                 | 211     | 15.8  | 33         | 12.7  |
|                          | 65-69yr                 | 192     | 14.4  | 28         | 10.8  |
|                          | Mean age (SD)           | 54.4    | (8.5) | 53.0       | (8.4) |
| Health check             | Dispansarisation        |         |       |            |       |
|                          | No                      | 441     | 33.1  | 260        | 100   |
|                          | Yes                     | 891     | 66.9  | 0          | 0.0   |
| Socio-economics          | Education               |         |       |            |       |
|                          | Elementary only         | 121     | 9.1   | 35         | 13.5  |
|                          | Intermediary            | 660     | 49.6  | 122        | 46.9  |
|                          | Graduate                | 551     | 41.4  | 103        | 39.6  |
|                          | Economic activity       |         |       |            |       |
|                          | Paid work               | 444     | 33.4  | 107        | 41.2  |
|                          | Looking after home      | 134     | 10.1  | 23         | 8.9   |
|                          | Unemployed              | 22      | 1.7   | 3          | 1.2   |
|                          | Retired                 | 711     | 53.4  | 123        | 47.3  |
|                          | Other                   | 20      | 1.5   | 4          | 1.5   |
|                          | Financial constraints   |         |       |            |       |
|                          | Constrained             | 253     | 19.2  | 59         | 23.7  |
|                          | Intermediary            | 668     | 50.6  | 114        | 45.8  |
| Relatively unconstrained | 400                     | 30.3    | 76    | 30.5       |       |
| Social support           | Single                  |         |       |            |       |
|                          | No                      | 790     | 59.3  | 159        | 61.2  |
|                          | Yes                     | 542     | 40.7  | 101        | 38.9  |
| Smoking                  | Smoking status          |         |       |            |       |
|                          | Never smoker            | 903     | 68.0  | 157        | 60.4  |
|                          | Ex-smoker               | 222     | 16.7  | 38         | 14.6  |
|                          | Current smoker          | 204     | 15.4  | 65         | 25.0  |
| Alcohol                  | Alcohol use disorder    |         |       |            |       |
|                          | Non-drinker (past year) | 136     | 10.2  | 25         | 9.6   |
|                          | Low (Audit score <8)    | 1,163   | 87.6  | 224        | 86.2  |
|                          | High (Audit score 8+)   | 29      | 2.2   | 11         | 4.2   |

|          |                           |       |      |     |      |
|----------|---------------------------|-------|------|-----|------|
|          | Alcohol intake            |       |      |     |      |
|          | Non-drinker               | 136   | 10.2 | 25  | 9.6  |
|          | <2.5g/day                 | 788   | 59.3 | 149 | 57.3 |
|          | 2.5-6.9g/day              | 292   | 22.0 | 56  | 21.5 |
|          | 7-14.9g/day               | 73    | 5.5  | 18  | 6.9  |
|          | 15-20.9g/day              | 22    | 1.7  | 5   | 1.9  |
|          | 21+g/day                  | 18    | 1.4  | 7   | 2.7  |
| Exercise | Physical activity         |       |      |     |      |
|          | Inactive                  | 102   | 7.8  | 17  | 6.7  |
|          | Moderately inactive       | 125   | 9.5  | 30  | 11.8 |
|          | Moderately active         | 771   | 58.7 | 142 | 55.7 |
|          | Active                    | 316   | 24.1 | 66  | 25.9 |
| Health   | BMI class                 |       |      |     |      |
|          | Normal/under weight       | 436   | 32.8 | 94  | 36.3 |
|          | Overweight                | 440   | 33.1 | 73  | 28.2 |
|          | Obese                     | 455   | 34.2 | 92  | 35.5 |
|          | Self-rated general health |       |      |     |      |
|          | Poor/fair/good            | 792   | 59.6 | 126 | 48.5 |
|          | Very good/excellent       | 537   | 40.4 | 134 | 51.5 |
|          | Chest pain                |       |      |     |      |
|          | No chest pain             | 704   | 54.4 | 159 | 64.1 |
|          | Non-anginal chest pain    | 374   | 28.9 | 54  | 21.8 |
|          | Grade 1 angina            | 175   | 13.5 | 33  | 13.3 |
|          | Grade 2 angina            | 42    | 3.2  | 2   | 0.8  |
|          | CVD risk 10yr SCORE       |       |      |     |      |
|          | <1%                       | 653   | 49.9 | 144 | 56.5 |
|          | 1-4.9%                    | 535   | 40.8 | 77  | 30.2 |
|          | 5+%                       | 122   | 9.3  | 34  | 13.3 |
|          | Hypertension class        |       |      |     |      |
|          | Normotensive              | 628   | 47.6 | 140 | 54.9 |
|          | Controlled hypertension   | 304   | 23.0 | 24  | 9.4  |
|          | Uncontrolled hypertension | 219   | 16.6 | 38  | 14.9 |
|          | Untreated hypertension    | 169   | 12.8 | 53  | 20.8 |
|          | Hypertension aware        |       |      |     |      |
|          | No                        | 708   | 53.2 | 175 | 67.3 |
|          | Yes                       | 624   | 46.9 | 85  | 32.7 |
|          | Diabetic                  |       |      |     |      |
|          | No                        | 1,198 | 89.9 | 242 | 93.1 |
|          | Yes                       | 134   | 10.1 | 18  | 6.9  |



|            |                                           |       |      |     |      |
|------------|-------------------------------------------|-------|------|-----|------|
|            | CKD                                       |       |      |     |      |
|            | No                                        | 1,280 | 96.1 | 245 | 94.2 |
|            | Yes                                       | 52    | 3.9  | 15  | 5.8  |
|            | Any care-intensive condition <sup>a</sup> |       |      |     |      |
|            | No                                        | 593   | 44.5 | 155 | 59.6 |
|            | Yes                                       | 739   | 55.5 | 105 | 40.4 |
| Medication | Polypharmacy 5+rx                         |       |      |     |      |
|            | No                                        | 1,248 | 93.7 | 258 | 99.2 |
|            | Yes                                       | 84    | 6.3  | 2   | 0.8  |
|            | Non-opioid analgesics                     |       |      |     |      |
|            | No                                        | 1,315 | 98.7 | 256 | 98.5 |
|            | Yes                                       | 17    | 1.3  | 4   | 1.5  |

---

<sup>a</sup>) Care-intensive conditions included: CKD, chronic bronchitis, cancer, asthma, rheumatoid arthritis, osteoarthritis, migraine, opioid analgesics use.

**Table S5** Multivariable logistic regression analysis of a) no recent primary care contact (primary care visit in past year or recent general health check attendance) versus those with contact in CVD-free 40-69 year olds; b) no primary care visit in past year versus those with primary care visit in past year in CVD-free 40-69 year olds: age-adjusted odds ratios (AOR) by 10-year CVD risk class (SCORE).

| Group  | Outcome                                                                          | 10-year CVD Risk | Age-adjusted OR (Main analysis) | P-value | Age-adjusted OR* (no primary care visit/contact, but hospital visits) | P-value |
|--------|----------------------------------------------------------------------------------|------------------|---------------------------------|---------|-----------------------------------------------------------------------|---------|
| Male   | a) No primary care visit in past year nor recent general health check attendance | <1%              | Ref                             |         | Ref                                                                   |         |
|        |                                                                                  | 1-4.9%           | 1.03 (0.67;1.59)                | .890    | 1.04 (0.67;1.61)                                                      | .872    |
|        |                                                                                  | 5+%              | <b>2.08</b> (1.15;3.76)         | .016    | <b>2.21</b> (1.21;4.02)                                               | .010    |
|        | b) No primary care visit in past year                                            | <1%              | Ref                             |         | Ref                                                                   |         |
|        |                                                                                  | 1-4.9%           | 1.10 (0.72;1.66)                | .662    | 1.10 (0.73;1.67)                                                      | .649    |
|        |                                                                                  | 5+%              | <b>2.03</b> (1.15;3.59)         | .014    | <b>2.12</b> (1.20;3.76)                                               | .010    |
| Female | a) No primary care visit in past year nor recent general health check attendance | <1%              | Ref                             |         | Ref                                                                   |         |
|        |                                                                                  | 1-4.9%           | 1.05 (0.65;1.69)                | .852    | 1.00 (0.61;1.63)                                                      | .995    |
|        |                                                                                  | 5+%              | <b>2.58</b> (1.27;5.23)         | .009    | <b>2.52</b> (1.22;5.17)                                               | .012    |
|        | b) No primary care visit in past year                                            | <1%              | Ref                             |         | Ref                                                                   |         |
|        |                                                                                  | 1-4.9%           | 1.21 (0.82;1.79)                | .344    | 1.18 (0.79;1.76)                                                      | .414    |
|        |                                                                                  | 5+%              | <b>2.53</b> (1.40;4.58)         | .002    | <b>2.33</b> (1.27;4.27)                                               | .006    |

\*) Sensitivity analysis taking into account that 5.5% of those who did not see a primary care doctor but did visit a hospital in the past year.
